# Supplementary material
Source: ML conference proceedings conference paper supplement (https://proceedings.neurips.cc/paper_files/paper/2018/hash/95d309f0b035d97f69902e7972c2b2e6-Abstract.html)
Supplement: Supplementary file [file 95d309f0b035d97f69902e7972c2b2e6-Supplemental.zip]

---

# Supplementary: Constructing Deep Neural Networks by Bayesian Network Structure Learning

---

**Raanan Y. Rohekar**

Intel AI Lab

raanan.yehezkel@intel.com

**Shami Nisimov**

Intel AI Lab

shami.nisimov@intel.com

**Yaniv Gurwicz**

Intel AI Lab

yaniv.gurwicz@intel.com

**Guy Koren**

Intel AI Lab

guy.koren@intel.com

**Gal Novik**

Intel AI Lab

gal.novik@intel.com

## A Preservation of Conditional Dependence

We prove that conditional dependence relations encoded by the generative structure  $G$  are preserved by the discriminative structure  $G_{\text{dis}}$  conditioned on the class  $Y$ . That is,  $G_{\text{dis}}$  conditioned on  $Y$  can mimic  $G$ ; denoted by  $G \preceq G_{\text{dis}}|Y$ , a preference relation. While the parameters of a model can learn to mimic conditional independence relations that are not expressed by the graph structure, they are not able to learn conditional dependence relations (Pearl, 2009).

**Proposition 1.** *Graph  $G_{\text{inv}}$  preserves all conditional dependencies in  $G$  (i.e.,  $G \preceq G_{\text{inv}}$ ).*

*Proof.* Graph  $G_{\text{inv}}$  can be constructed using the procedures described by Stuhlmüller et al. (2013) where nodes are added, one-by-one, to  $G_{\text{inv}}$  in a reverse topological order (lowest first) and connected (as a child) to existing nodes in  $G_{\text{inv}}$  that d-separate it, according to  $G$ , from the remainder of  $G_{\text{inv}}$ . Paige & Wood (2016) showed that this method ensures  $G \preceq G_{\text{inv}}$ , the preservation of conditional dependence. We set an equal topological order to every pair of latents  $(H_i, H_j)$  sharing a common child in  $G$ . Hence, jointly adding nodes  $H_i$  and  $H_j$  to  $G_{\text{inv}}$ , connected by a bi-directional edge, requires connecting them (as children) only to their children and the parents of their children ( $H_i$  and  $H_j$  themselves, by definition) in  $G$ . That is, without loss of generality, node  $H_i$  is d-separated from the remainder of  $G_{\text{inv}}$  given its children in  $G$  and  $H_j$ . ■

It is interesting to note that the stochastic inverse  $G_{\text{inv}}$ , constructed without adding inter-layer connections, preserves all conditional dependencies in  $G$ .

**Proposition 2.** *Graph  $G_{\text{dis}}$ , conditioned on  $Y$ , preserves all conditional dependencies in  $G_{\text{inv}}$  (i.e.,  $G_{\text{inv}} \preceq G_{\text{dis}}|Y$ ).*

*Proof.* It is only required to prove that the dependency relations that are represented by bi-directional edges in  $G_{\text{inv}}$  are preserved in  $G_{\text{dis}}$ . The proof follows directly from the d-separation criterion (Pearl, 2009). A latent pair  $\{H, H'\} \subset \mathbf{H}^{(n+1)}$ , connected by a bi-directional edge in  $G_{\text{inv}}$ , cannot be d-separated by any set containing  $Y$ , as  $Y$  is a descendant of a common child of  $H$  and  $H'$ . In Algorithm 1-line 16, a latent in  $\mathbf{H}^{(n)}$  is connected, as a child (as a parent in  $G$ ), to latents  $\mathbf{H}^{(n+1)}$ , and  $Y$  to  $\mathbf{H}^{(0)}$ . ■

We formulate  $G_{\text{inv}}$  as a projection of another latent model (Pearl, 2009) where bi-directional edges represent dependency relations induced by latent variables  $\mathbf{Q}$ . We construct a discriminative model by considering the effect of  $\mathbf{Q}$  as an explaining-away relation induced by the target node  $Y$ . Thus, conditioned on  $Y$ , the discriminative graph  $G_{\text{dis}}$  preserves all conditional (and marginal) dependencies in  $G_{\text{inv}}$ .

**Proposition 3.** Graph  $G_{\text{dis}}$ , conditioned on  $Y$ , preserves all conditional dependencies in  $G$  (i.e.,  $G \preceq G_{\text{dis}}$ ).

*Proof.* It immediately follows from Propositions 1 & 2 that  $G \preceq G_{\text{inv}} \preceq G_{\text{dis}}$  conditioned on  $Y$ . ■

Thus  $G \preceq G_{\text{inv}} \preceq G_{\text{dis}}$  conditioned on  $Y$ .

## B Flowchart

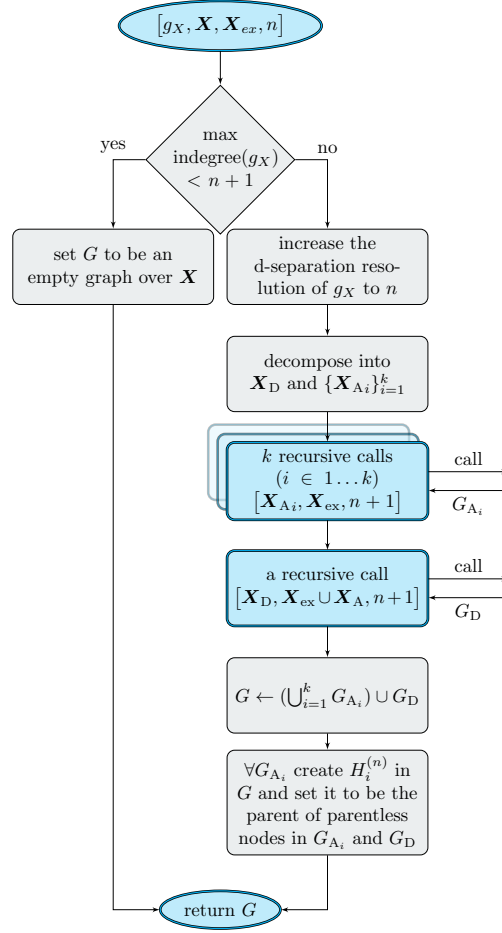

Figure 1: Flowchart of the DeepGen algorithm.

## References

- Paige, Brooks and Wood, Frank. Inference networks for sequential Monte Carlo in graphical models. In *Proceedings of the 33rd International Conference on Machine Learning*, volume 48 of *JMLR*, 2016.
- Pearl, Judea. *Causality: Models, Reasoning, and Inference*. Cambridge university press, second edition, 2009.
- Stuhlmüller, Andreas, Taylor, Jacob, and Goodman, Noah. Learning stochastic inverses. In *Advances in neural information processing systems*, pp. 3048–3056, 2013.
